# Supplementary material for: COVID-19 lockdown and fatal motor vehicle collisions due to speed-related traffic violations in Japan: a time-series study
Source: HighWire-hosted journal article supplement (doi:10.1136/injuryprev-2020-043947), 2020-10-16
Supplement: injuryprev-2020-043947supp001_data_supplement.pdf [file injuryprev-2020-043947supp001_data_supplement.pdf]

**Supplementary Table 1** Trends in enforcement of violations of the Road Traffic Act in Japan between January and June from 2015 to 2020

| Type of violation                                                                                                             | Year             |                  |                  |                  |                  |                  |
|-------------------------------------------------------------------------------------------------------------------------------|------------------|------------------|------------------|------------------|------------------|------------------|
|                                                                                                                               | 2015             | 2016             | 2017             | 2018             | 2019             | 2020             |
| Unlicensed                                                                                                                    | 11,132           | 10,463           | 10,192           | 9,465            | 9,214            | 9,447            |
| Drunk driving                                                                                                                 | 12,897           | 12,595           | 13,597           | 13,132           | 12,441           | 11,292           |
| Speeding                                                                                                                      | 839,478          | 800,655          | 740,940          | 621,648          | 565,602          | 576,415          |
| Disregarding traffic signal                                                                                                   | 376,280          | 371,727          | 366,629          | 342,669          | 323,110          | 306,466          |
| Impeding pedestrians                                                                                                          | 51,245           | 54,765           | 75,525           | 86,727           | 110,252          | 139,578          |
| Failure to stop at stop sign                                                                                                  | 666,641          | 675,072          | 667,304          | 643,635          | 656,137          | 784,011          |
| Driving while fatigued                                                                                                        | 97               | 51               | 38               | 41               | 55               | 43               |
| Driving a motor vehicle in violation of loading rules                                                                         | 5,974            | 6,451            | 6,602            | 6,533            | 6,325            | 6,453            |
| Violation of the prohibition of passage                                                                                       | 395,159          | 381,128          | 376,621          | 344,074          | 337,596          | 357,248          |
| Improper overtaking or road or lane infringement                                                                              | 129,033          | 122,829          | 118,961          | 107,187          | 103,631          | 104,369          |
| Failure to slow down                                                                                                          | 629              | 534              | 395              | 287              | 248              | 198              |
| Driving improperly maintained vehicle                                                                                         | 15,971           | 14,010           | 13,666           | 11,434           | 10,839           | 11,529           |
| Driving vehicle without proper muffler                                                                                        | 1,437            | 1,306            | 1,125            | 970              | 920              | 1,232            |
| Failure to stop at railroad crossing                                                                                          | 53,126           | 49,837           | 47,534           | 42,585           | 39,462           | 46,245           |
| Using wireless communication equipment while driving                                                                          | 532,996          | 483,060          | 475,013          | 432,650          | 384,758          | 153,001          |
| Violating the method of turning left/right                                                                                    | 27,324           | 27,160           | 29,841           | 27,741           | 25,814           | 25,544           |
| Suddenly starting motor vehicle or motorized bicycle, etc. in a manner that makes noise causing an extreme nuisance to others | 141              | 135              | 134              | 127              | 115              | 156              |
| Other dynamic violations                                                                                                      | 222,292          | 209,210          | 197,673          | 179,728          | 158,675          | 150,326          |
| Stopping or parking a vehicle in a prohibited place                                                                           | 18,933           | 17,485           | 16,112           | 15,103           | 14,687           | 13,074           |
| Parking a vehicle in a prohibited place                                                                                       | 116,361          | 112,391          | 107,985          | 95,034           | 90,432           | 83,246           |
| Violating the obligation to carry and present license cards                                                                   | 33,149           | 31,889           | 31,045           | 28,212           | 27,074           | 26,492           |
| Driving without fastening the seat belt                                                                                       | 568,865          | 480,371          | 432,648          | 360,940          | 314,124          | 255,300          |
| Riding without a helmet for motorcyclists                                                                                     | 7,211            | 6,081            | 5,293            | 4,589            | 4,036            | 4,289            |
| Driving without restraining a toddler by a toddler restraint system                                                           | 65,577           | 56,159           | 52,067           | 42,096           | 34,740           | 25,874           |
| The order to pay the Abandonment Penalty                                                                                      | 576,735          | 554,760          | 532,442          | 495,759          | 465,979          | 420,828          |
| <b>Total</b>                                                                                                                  | <b>4,728,683</b> | <b>4,480,124</b> | <b>4,319,382</b> | <b>3,912,366</b> | <b>3,696,266</b> | <b>3,512,656</b> |

Source: National Police Agency. Traffic Accident Statistics. 2020. [https://www.npa.go.jp/publications/statistics/koutsuu/toukeihyo\\_e.html](https://www.npa.go.jp/publications/statistics/koutsuu/toukeihyo_e.html) (accessed 25 Sep 2020).
